# Supplementary material for: An investigation of the polymorphism of a potent nonsteroidal anti-inflammatory drug flunixin
Source: Royal Society of Chemistry journal article supplement (doi:10.1039/c9ce01619h), 2019-11-24
Supplement: c9ce01619h1.pdf [file c9ce01619h1.pdf]

# An Investigation of the Polymorphism of a Potent Nonsteroidal Anti-inflammatory Drug Flunixin

*Hao Liu<sup>1</sup>, Xing Yang<sup>1</sup>, Shanyu Wu<sup>2</sup>, Mingtao Zhang<sup>2</sup>, Sean Parkin<sup>3</sup>, Shuang*

*Cao<sup>1</sup>, Tonglei Li<sup>4</sup>, Faquan Yu<sup>1#</sup>, Sihui Long<sup>1\*</sup>*

## **Crystal Growth**

Example: 250 mg of FLX was suspended in 5 mL ethyl acetate. The mixture was stirred overnight and the remaining solid was removed by pipette filtration. A vial containing the clear solution was covered with perforated parafilm. Slow evaporation led to single crystals in about a week.

For slow cooling, a saturated solution in a vial covered by cover glass was concentrated to 1/2, 1/3, 1/4 of the original volume by gentle heating on a hot plate. The heat source was removed and the vial was sealed, whereupon the solution cooled to room temperature.

## **Crystal structure determination by single-crystal X-ray diffraction (SCXR)**

Data collection was carried out at 90 K and 293 K on a Nonius kappaCCD diffractometer with MoK $\alpha$  radiation ( $\lambda = 0.71073 \text{ \AA}$ ).<sup>1</sup> Cell refinement and data reduction were done using SCALEPACK and DENZO-SMN.<sup>2</sup> Structure solution and refinement were carried out using the SHELXS97 and SHELXL97 programs, respectively.<sup>3,4</sup>

## **Powder X-ray diffraction**

Powder X-ray diffraction (PXRD) data for each sample were collected on a Rigaku X-ray diffractometer with CuK $\alpha$  radiation (40 kV, 40 mA,  $\lambda = 1.5406 \text{ \AA}$ ) between 5.0 - 50.0° (2 $\theta$ ) at ambient temperatures. The finely ground sample was placed on a quartz plate in an aluminum holder.

## Thermal Analysis

The thermal behavior of FLX was investigated by differential scanning calorimetry (DSC). These experiments were performed on TA Instruments DSCQ20-1250. For DSC, Tzero<sup>®</sup> pans and aluminum hermetic lids with a pinhole were used at a heating rate of 10 °C/min.

## Spectroscopic Studies (FT-IR and Raman)

IR spectrum was recorded with the sample dispersed in KBr pellets using a Perkin-Elmer FT-IR spectrometer (Perkin Elmer, US), while Raman spectrum was recorded on a sample compressed in a gold-coated sample holder using a Thermo Electron DXR Laser Confocal Microscopy Raman Spectrometer (Thermo Fisher, US).

Figure S1 FT-IR spectra of the two forms of FLX

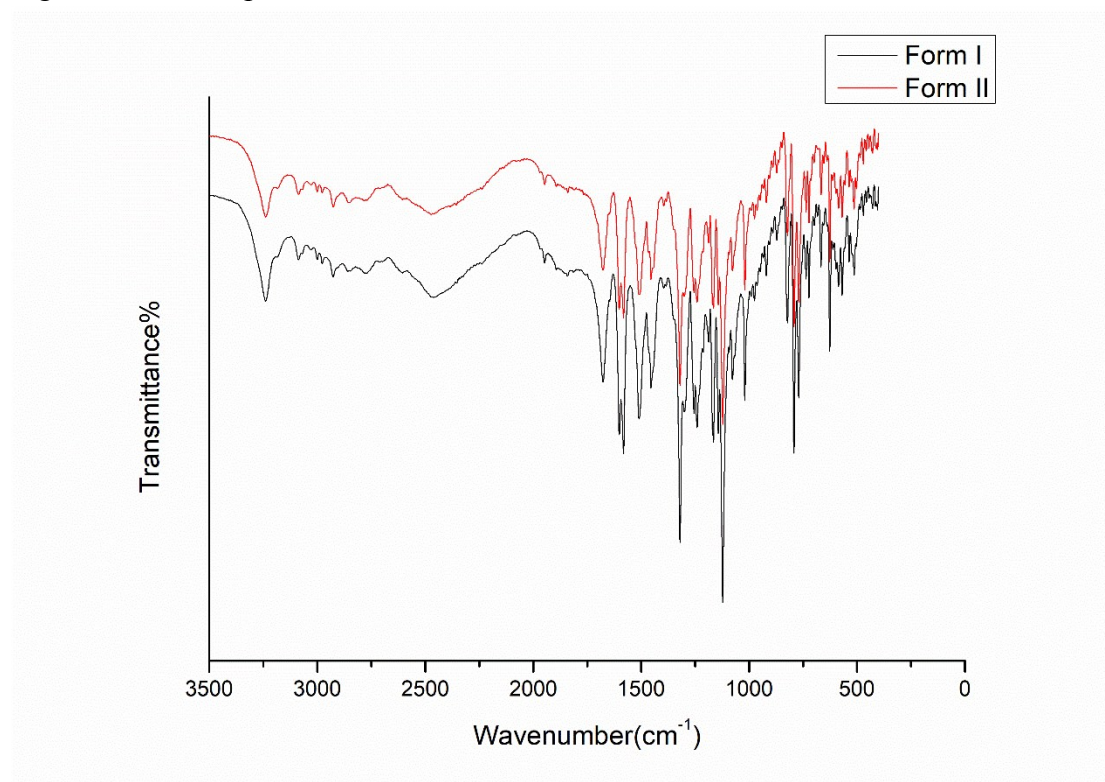

Figure S2 Raman spectra of the two forms of FLX

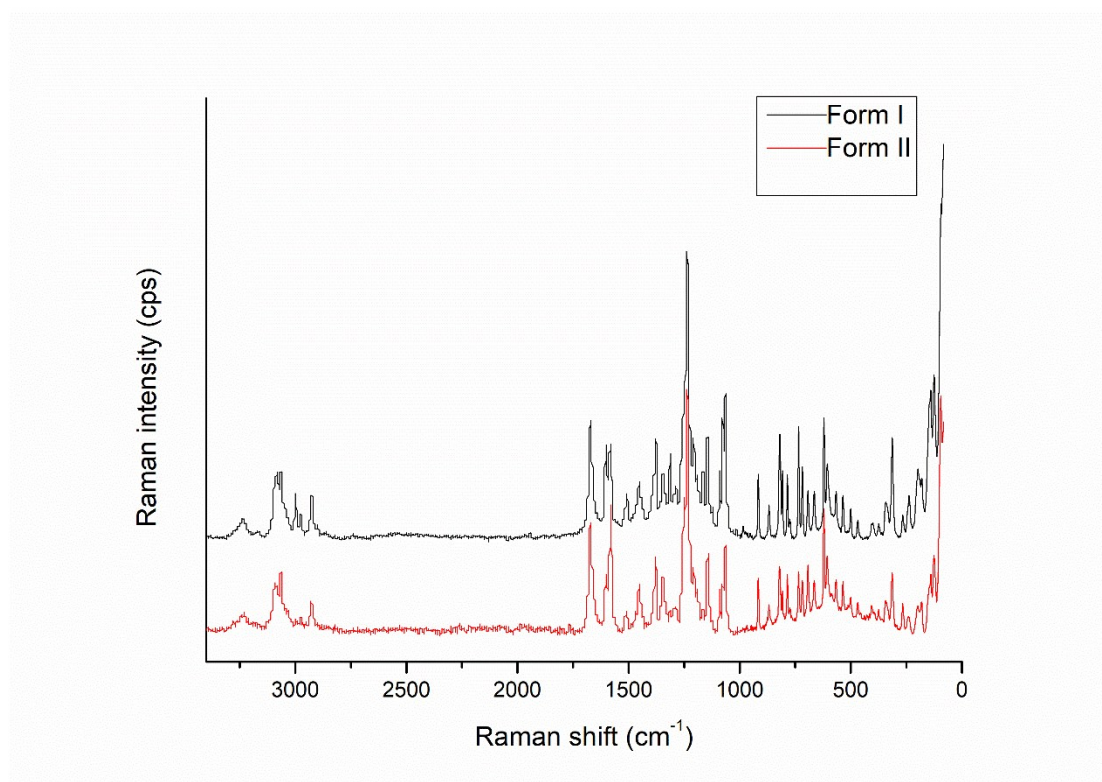

#### References

1. Nonius, Collect, Nonius BV, Delft, the Netherlands, 2002
2. Otwinowski, Z.; Minor, W. in *Methods in Enzymology: Macromolecular Crystallography, Part A*, eds. C. W. Carter Jr. and R. M. Sweet, Academic Press, New York, 1997, vol. 276, pp. 307-326
3. Sheldrick, G. M. University of Gottingen, 1997
4. Sheldrick, G. M. *Acta Crystallogr., Sect. A: Found. Crystallogr.* 2008, **64**, 112-122
